# Supplementary material
Source: PubMed Central journal article supplement (PMC7805309)
Supplement: advancesADV2020003456-suppl1.pdf [file advancesADV2020003456-suppl1.pdf]

**Supplemental Table. COMPARISON OF OUTCOMES ASSOCIATED WITH SPECIFIC THERAPIES WHILE HOSPITALIZED, panel A; anti-coagulation (both prophylactic (86%) and therapeutic (14%)), panel B; hydroxychloroquine, panel C; and transfusion (both simple and exchange), panel D, treatment during admission.**

| COMPARISON OF OUTCOMES ASSOCIATED WITH SPECIFIC THERAPIES WHILE HOSPITALIZED |    |             |     |             |              |
|------------------------------------------------------------------------------|----|-------------|-----|-------------|--------------|
| A. HYDROXYUREA                                                               |    |             |     |             |              |
|                                                                              | No |             | Yes |             | p value*     |
|                                                                              | N  | Results     | N   | Results     |              |
| Change of creatinine†                                                        | 22 | 0.4 (0.9)   | 10  | 0.2 (0.4)   | 0.38         |
| Change of LDH†                                                               | 19 | 139 (297.3) | 9   | 131 (260.5) | 0.75         |
| Change of D-dimer†                                                           | 15 | 1.3 (2.9)   | 4   | 1.8 (3.6)   | 0.92         |
| Mechanical ventilation                                                       | 23 | 3 (13)      | 10  | 0           | 0.54         |
| LOS, median (IQR)                                                            | 24 | 4 (3-10)    | 10  | 5 (2-10)    | >0.9         |
| ICU admission                                                                | 24 | 3 (13)      | 10  | 0           | 0.54         |
| Death‡                                                                       | 24 | 4 (17)      | 10  | 0           | 0.30         |
| B. ANTI-COAGULATION                                                          |    |             |     |             |              |
|                                                                              | No |             | Yes |             | p value*     |
|                                                                              | N  | Results     | N   | Results     |              |
| Change of creatinine†                                                        | 14 | 0.5 (1.1)   | 29  | 0.3 (0.6)   | 0.42         |
| Change of LDH†                                                               | 13 | 135 (288.5) | 27  | 87 (219.2)  | 0.76         |
| Change of D-dimer†                                                           | 8  | 0.5 (1.0)   | 17  | 1.6 (3.1)   | 0.38         |
| Mechanical ventilation                                                       | 18 | 2 (11)      | 32  | 2 (6)       | 0.61         |
| LOS, median (IQR)                                                            | 18 | 3 (2-6)     | 32  | 8 (4-12)    | <b>0.018</b> |
| ICU admission                                                                | 18 | 2 (11)      | 32  | 4 (13)      | >0.9         |
| Death                                                                        | 18 | 4 (22)      | 32  | 2 (6)       | 0.17         |
| C. HYDROXYCHLOROQUINE                                                        |    |             |     |             |              |
|                                                                              | No |             | Yes |             | p value*     |
|                                                                              | N  | Results     | N   | Results     |              |
| Change of creatinine†                                                        | 24 | 0.2 (0.5)   | 19  | 0.5 (1.0)   | 0.14         |
| Change of LDH†                                                               | 22 | 61 (185.8)  | 18  | 154 (292.8) | 0.51         |
| Change of D-dimer†                                                           | 11 | 0           | 14  | 2.2 (3.2)   | <b>0.002</b> |
| Mechanical ventilation                                                       | 31 | 2 (6)       | 19  | 2 (11)      | 0.63         |
| LOS, median (IQR)                                                            | 31 | 4 (2-8)     | 19  | 8 (4-13)    | <b>0.034</b> |
| ICU admission                                                                | 31 | 4 (13)      | 19  | 2 (11)      | >0.9         |
| Death                                                                        | 31 | 2 (6)       | 19  | 4(21)       | 0.18         |
| D. TRANSFUSION                                                               |    |             |     |             |              |
|                                                                              | No |             | Yes |             | p value*     |
|                                                                              | N  | Results     | N   | Results     |              |
| Change of creatinine†                                                        | 15 | 0.2 (0.6)   | 28  | 0.4 (0.9)   | 0.07         |
| Change of LDH†                                                               | 13 | 4 (11.5)    | 27  | 150 (282.8) | 0.05         |
| Change of D-dimer†                                                           | 5  | 0           | 20  | 1.5 (2.8)   | 0.13         |
| Mechanical ventilation                                                       | 20 | 1 (5)       | 30  | 3 (10)      | 0.64         |
| LOS, median (IQR)                                                            | 20 | 3 (2-6)     | 30  | 10 (4-13)   | <b>0.002</b> |
| ICU admission                                                                | 20 | 1 (5)       | 30  | 5 (17)      | 0.38         |
| Death                                                                        | 20 | 1           | 30  | 5 (17)      | 0.38         |

Results are n (%) unless otherwise specified.

† Mean (SD) change of value from admission to max.

‡ it should be noted that one patient with HbSC with RHC proven pulmonary hypertension, not on hydroxyurea, who died, was not included in analysis because he was not hospitalized, therefore the N in this table is 4 instead of 5.

\* p value compares those who received therapy and those who did not.
